# Supplementary material for: Quality Evaluation of Poultry Litter Biochar Produced at Different Pyrolysis Temperatures as a Sustainable Management Approach and Its Impact on Soil Carbon Mineralization
Source: MDPI journal article supplement (doi:10.3390/agronomy11091692), 2021-08-25
Supplement: s1 [file s1]

# **Supplementary Materials**

## **Poultry Litter Biochar as Gentle Soil Amendments of a Multi-Contaminated Soil: C Sequestration and Nutrient Release**

Chen-Chi Tsai\* and Yu-Fang Chang

Department of Forestry and Natural Resources, National Ilan University, Ilan

26047, Taiwan; yufang0115@gmail.com

\* Correspondence: cctsai@niu.edu.tw

**Table S1.** Cumulative C mineralized during the incubation period (mg CO<sub>2</sub>-C [kg soil]<sup>-1</sup>). In each column, mean values followed by the same letter do not differ significantly ( $p < 0.05$ ).

| Treatments <sup>1</sup> | Day 0  | Day 1  | Day 2  | Day 3  | Day 5  | Day 9   | Day 17  | Day 31  | Day 56  |
|-------------------------|--------|--------|--------|--------|--------|---------|---------|---------|---------|
| Control                 | 89.7 o | 176 m  | 247 m  | 299 m  | 376 m  | 492 m   | 635 m   | 758 m   | 914 o   |
| P2-1                    | 198 i  | 496 h  | 786 g  | 981 g  | 1201 g | 1463 g  | 1750 g  | 2004 f  | 2332 h  |
| P2-5                    | 496 d  | 1603 c | 2927 c | 3829 c | 4728 c | 5599 c  | 6458 c  | 7100 c  | 7928 c  |
| P2-10                   | 735 a  | 2693 a | 5060 a | 7246 a | 9188 a | 10863 a | 12607 a | 13807 a | 15187 a |
| P3-1                    | 185 j  | 441 i  | 712 h  | 888 h  | 1104 h | 1351 h  | 1625 h  | 1855 g  | 2158 i  |
| P3-5                    | 445 e  | 1377 e | 2581 d | 3366 d | 4172 d | 4958 d  | 5732 d  | 6309 d  | 7040 e  |
| P3-10                   | 588 b  | 2031 b | 4261 b | 6165 b | 8060 b | 9719 b  | 11255 b | 12391 b | 13625 b |
| P4-1                    | 153 l  | 322 k  | 471 jk | 581 j  | 718 j  | 890 j   | 1115 j  | 1323 i  | 1599 k  |
| P4-5                    | 369 f  | 901 f  | 1388 f | 1722 f | 2102 f | 2542 f  | 3039 f  | 3475 e  | 4018 f  |
| P4-10                   | 560 c  | 1504 d | 2428 e | 3135 e | 3881 e | 4663 e  | 5540 e  | 6268 d  | 7230 d  |
| P5-1                    | 124 m  | 245 l  | 329 l  | 395 l  | 486 l  | 627 l   | 817 l   | 979 k   | 1181 m  |
| P5-5                    | 218 h  | 421 ij | 558 i  | 658 i  | 789 i  | 984 i   | 1250 i  | 1495 h  | 1815 j  |
| P5-10                   | 302 g  | 599 g  | 789 g  | 914 h  | 1105 h | 1378 h  | 1718 h  | 2051 f  | 2487 g  |
| P6-1                    | 107 n  | 212 l  | 293 lm | 352 lm | 436 lm | 568 l   | 745 l   | 895 l   | 1084 n  |
| P6-5                    | 164 k  | 310 k  | 413 k  | 475 k  | 566 k  | 728 k   | 951 k   | 1166 j  | 1454 l  |
| P6-10                   | 216 h  | 396 j  | 528 ij | 610 ij | 731 ij | 926 ij  | 1196 i  | 1447 h  | 1798 j  |

<sup>1</sup>: P2, P3, P4, P5, P6 = poultry litter pyrolyzed at 200, 300, 400, 500, and 600°C; -1 = 1% biochar addition; -5 = 5% biochar addition; -10 = 10% biochar addition.

**Table S2.** Significant difference of CO<sub>2</sub>-C release of nine times monitoring between addition rates and treats compared to the control during 56 days of incubation.

| Treats       | n  | Day 0               | Day 1               | Day 2               | Day 3               | Day 5               | Day 9               | Day 17              | Day 30              | Day 56              |
|--------------|----|---------------------|---------------------|---------------------|---------------------|---------------------|---------------------|---------------------|---------------------|---------------------|
|              |    | mg kg <sup>-1</sup> |
| <i>Rate</i>  |    |                     |                     |                     |                     |                     |                     |                     |                     |                     |
| Control      | 3  | 89.7 d <sup>1</sup> | 86.0 d              | 71.3 d              | 52.3 d              | 76.7 d              | 117 d               | 142 d               | 123 d               | 156 d               |
| 1%           | 15 | 153 c               | 190 c               | 175 c               | 121 c               | 150 c               | 191 c               | 231 c               | 201 c               | 259 c               |
| 5%           | 15 | 338 b               | 584 b               | 651 b               | 437 b               | 461 b               | 491 b               | 524 b               | 423 b               | 542 b               |
| 10%          | 15 | 480 a               | 965 a               | 1169 a              | 1001 a              | 979 a               | 917 a               | 953 a               | 730 a               | 872 a               |
| <i>Treat</i> |    |                     |                     |                     |                     |                     |                     |                     |                     |                     |
| Control      | 3  | 89.7 f              | 86.0 f              | 71.3 f              | 52.3 f              | 76.7 e              | 117 f               | 142 f               | 123 f               | 156 f               |
| P2           | 9  | 476 a               | 1121 a              | 1327 a              | 1094 a              | 1021 a              | 936 a               | 963 a               | 698 a               | 845 a               |
| P3           | 9  | 406 b               | 877 b               | 1235 b              | 955 b               | 971 b               | 898 b               | 861 b               | 648 b               | 756 b               |
| P4           | 9  | 361 c               | 548 c               | 520 c               | 383 c               | 421 c               | 465 c               | 533 c               | 458 c               | 593 c               |
| P5           | 9  | 215 d               | 207 d               | 137 d               | 97.4 d              | 137 e               | 203 d               | 266 d               | 246 d               | 319 d               |
| P6           | 9  | 162 e               | 143 e               | 106 e               | 67.2 e              | 98.8 e              | 163 e               | 223 e               | 205 e               | 276 e               |

<sup>1</sup> Means followed by different lowercase letter are significantly different for each parameter in the rate column and treat column ( $p < 0.01$ ).

**Table S3.** Significant test of cumulative CO<sub>2</sub>-C, and water extraction solution pH and electrical conductivity after 56 days incubation.

| Treats <sup>1</sup> | Cumulative CO <sub>2</sub> -C <sup>2</sup> |                            | pH          |                            | Electrical conductivity          |                            |
|---------------------|--------------------------------------------|----------------------------|-------------|----------------------------|----------------------------------|----------------------------|
|                     | Mean±SD<br>(mg kg <sup>-1</sup> )          | Change<br>(%) <sup>2</sup> | Mean±SD     | Change<br>(%) <sup>2</sup> | Mean±SD<br>(dS m <sup>-1</sup> ) | Change<br>(%) <sup>2</sup> |
| Control             | 914±24 o <sup>3</sup>                      |                            | 4.4±0.07 k  |                            | 0.8±0.02 l                       |                            |
| P2-1                | 2332±46 h                                  | 155                        | 4.6±0.07 j  | 3                          | 1.2±0.01 k                       | 54                         |
| P2-5                | 7928±26 c                                  | 768                        | 5.5±0.06 g  | 24                         | 2.5±0.03 h                       | 211                        |
| P2-10               | 15187±88 a                                 | 1562                       | 6.5±0.02 d  | 47                         | 3.5±0.01 d                       | 328                        |
| P3-1                | 2158±54 i                                  | 136                        | 4.9±0.02 hi | 10                         | 1.2±0.02 k                       | 54                         |
| P3-5                | 7040±9 e                                   | 671                        | 6.3±0.01 f  | 41                         | 2.5±0.03 h                       | 211                        |
| P3-10               | 13625±122 b                                | 1391                       | 6.6±0.03 c  | 49                         | 3.7±0.03 c                       | 354                        |
| P4-1                | 1599±66 k                                  | 75                         | 4.8±0.01 i  | 9                          | 1.3±0.02 jk                      | 58                         |
| P4-5                | 4018±71 f                                  | 340                        | 6.3±0.03 f  | 41                         | 2.7±0.08 g                       | 240                        |
| P4-10               | 7230±101 d                                 | 691                        | 6.7±0.03 b  | 51                         | 4.0±0.03 b                       | 393                        |
| P5-1                | 1181±41 m                                  | 29                         | 4.9±0.02 hi | 10                         | 1.3±0.00 i                       | 65                         |
| P5-5                | 1815±12 j                                  | 99                         | 6.5±0.04 e  | 45                         | 3.2±0.05 e                       | 291                        |
| P5-10               | 2487±38 g                                  | 172                        | 6.9±0.04 a  | 54                         | 4.9±0.00 a                       | 507                        |
| P6-1                | 1084±40 n                                  | 19                         | 4.9±0.02 h  | 11                         | 1.3±0.01 ij                      | 64                         |
| P6-5                | 1454±24 l                                  | 59                         | 6.5±0.01 d  | 47                         | 3.0±0.03 f                       | 276                        |
| P6-10               | 1798±17 j                                  | 97                         | 6.9±0.02 a  | 55                         | 4.9±0.00 a                       | 502                        |

<sup>1</sup>: P2, P3, P4, P5, P6 = poultry litter pyrolyzed at 200, 300, 400, 500, and 600°C; -1 = 1% biochar addition; -5 = 5% biochar addition; -10 = 10% biochar addition; <sup>2</sup>: Percentage expressed as the difference of value between biochar amended treatments and un-amended control treatment; 0% indicates as No change in amount of those properties due to biochar addition; <sup>3</sup>: Means (n =3) compared within a column followed by a different lowercase letter are significantly different at p < 0.05 using a one-way ANOVA.
